# Supplementary material for: Molecular Detection and Phylogenetic Analyses of Babesia spp. and Theileria spp. in Livestock in Bangladesh
Source: MDPI journal article supplement (doi:10.3390/microorganisms11061563), 2023-06-13
Supplement: s1 [file s1]

Table S1. prevalence of piroplasms according to the sex of the host animals

| Pathogens            | Animal species |                |             |               |            |              | Total        |
|----------------------|----------------|----------------|-------------|---------------|------------|--------------|--------------|
|                      | Cattle         |                | Goats       |               | Gayals     |              |              |
|                      | Male (n=46)    | Female (n=128) | Male (n=24) | Female (n=69) | Male (n=3) | Female (n=6) |              |
| <i>B. bigemina</i>   | 30 (65.22%)    | 65 (50.78%)    | 6 (25.00%)  | 34 (49.28%)   | n.d.       | 1 (16.67%)   | 136 (49.28%) |
| <i>B. bovis</i>      | n.d.           | 1 (0.78%)      | n.d.        | 1 (1.45%)     | n.d.       | n.d.         | 2 (0.72%)    |
| <i>B. naoakii</i>    | 1 (2.17%)      | n.d.           | n.d.        | 2 (2.90%)     | n.d.       | n.d.         | 3 (1.09%)    |
| <i>B. ovis</i> *     | n.s.           | n.s.           | 8 (33.33%)  | 22 (31.88%)   | n.s.       | n.s.         | 30 (32.26%)  |
| <i>T. annulata</i>   | 1 (2.17%)      | 8 (6.25%)      | n.d.        | 2 (2.90%)     | 2 (66.66%) | 5 (83.33%)   | 18 (6.52%)   |
| <i>T. orientalis</i> | 34 (73.91%)    | 83 (64.84%)    | 1 (4.17%)   | 6 (8.70)      | 1 (33.33%) | 3 (50.00%)   | 128 (46.01%) |

\*Only screened for goats (n=93); n.d. not detected; n.s. not screened
