# Supplementary material for: Molecular Detection and Phylogenetic Analyses of Babesia spp. and Theileria spp. in Livestock in Bangladesh
Source: Microorganisms. 2023 Jun 13;11(6):1563. doi: 10.3390/microorganisms11061563 (PMC10301362; doi:10.3390/microorganisms11061563)
Supplement: Supplementary file 1 [file microorganisms-11-01563-s001.zip › Table S2.pdf]

Deleted: 1

Table S2. Co-infections with piroplasms in the blood samples of livestock in Bangladesh

| Status of infection                                            | Jhenaidah<br>(n = 29) | Bogura<br>(n = 14) | Sirajganj<br>(n = 107) | Bandarban<br>(n = 105) | Naikhonchari<br>(n = 21) | Total (%)<br>(n=276) |
|----------------------------------------------------------------|-----------------------|--------------------|------------------------|------------------------|--------------------------|----------------------|
| <b>Single infection</b>                                        |                       |                    |                        |                        |                          |                      |
| <i>B. bigemina</i>                                             | 3 (10.34%)            | 4 (28.57%)         | 29 (27.10%)            | 3 (2.86%)              | n.d.                     | 39 (14.13)           |
| <i>B. ovis</i>                                                 | 3 (10.34%)            | n.d.               | 11 (10.28%)            | n.d.                   |                          | 14 (5.07)            |
| <i>T. annulata</i>                                             | n.d.                  | n.d.               | n.d.                   | 1 (0.95%)              | 6 (28.57%)               | 7 (2.54)             |
| <i>T. orientalis</i>                                           | 4 (13.79%)            | 3 (21.43%)         | 3 (2.80%)              | 23 (21.90)             | 1 (4.76%)                | 34 (12.32)           |
| Sub total                                                      | 10 (34.48%)           | 7 (50.00%)         | 43 (40.19%)            | 27 (25.71%)            | 7 (33.33%)               | 94 (34.04)           |
| <b>Double infections</b>                                       |                       |                    |                        |                        |                          |                      |
| <i>B. bigemina</i> + <i>B. naoakii</i>                         | n.d.                  | n.d.               | 1 (0.93%)              | n.d.                   | n.d.                     | 1 (0.36)             |
| <i>B. bigemina</i> + <i>B. ovis</i>                            | 3 (10.34%)            | n.d.               | 8 (7.48%)              | 1 (0.95%)              | n.d.                     | 12 (4.35)            |
| <i>B. naoakii</i> + <i>B. ovis</i>                             | n.d.                  | n.d.               | 1 (0.93%)              | n.d.                   | n.d.                     | 1 (0.36)             |
| <i>B. bigemina</i> + <i>T. annulata</i>                        | n.d.                  | n.d.               | n.d.                   | 1 (0.95%)              | n.d.                     | 1 (0.36)             |
| <i>B. bigemina</i> + <i>T. orientalis</i>                      | 3 (10.34%)            | 4 (28.57%)         | 26 (24.30%)            | 46 (43.81%)            | n.d.                     | 79 (28.62%)          |
| <i>B. bovis</i> + <i>T. orientalis</i>                         | n.d.                  | n.d.               | n.d.                   | 1 (0.95%)              | n.d.                     | 1 (0.36)             |
| <i>B. ovis</i> + <i>T. orientalis</i>                          | n.d.                  | n.d.               | 2 (1.87%)              | n.d.                   | n.d.                     | 2 (0.72)             |
| <i>T. annulata</i> + <i>T. orientalis</i>                      | n.d.                  | n.d.               | n.d.                   | 1 (0.95%)              | 6 (28.57%)               | 7 (2.54)             |
| Sub total                                                      | 6 (20.68%)            | 4 (28.57%)         | 38 (35.51%)            | 50 (47.62%)            | 6 (28.57%)               | 104 (37.68)          |
| <b>Triple infections</b>                                       |                       |                    |                        |                        |                          |                      |
| <i>B. bigemina</i> + <i>B. bovis</i> + <i>B. ovis</i>          | n.d.                  | n.d.               | 1 (0.93%)              | n.d.                   | n.d.                     | 1 (0.36)             |
| <i>B. bigemina</i> + <i>B. naoakii</i> + <i>T. orientalis</i>  | n.d.                  | n.d.               | 1 (0.93%)              | n.d.                   | n.d.                     | 1 (0.36)             |
| <i>B. bigemina</i> + <i>T. annulata</i> + <i>T. orientalis</i> | n.d.                  | n.d.               | n.d.                   | 1 (0.95%)              | 2 (9.52%)                | 3 (1.09)             |
| Sub total                                                      | n.d.                  | n.d.               | 2 (1.87%)              | 1 (0.95%)              | 2 (9.52%)                | 5 (1.81)             |
| Grand total                                                    | 16 (55.17%)           | 11 (78.57%)        | 83 (77.57%)            | 78 (74.29%)            | 15 (71.43%)              | 203 (73.55)          |

n.d.: not detected
